# Supplementary material
Source: Springer Nature journal article supplement (https://www.springermedizin.de/resource/supplementary/12913_2009_1169_MOESM2_ESM.pdf/9528202)

*1 week*

*3 weeks*

*weeks between test-retest moments*

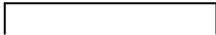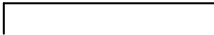

baseline

+ 1  
week

+ 4 weeks after baseline testing

Supplement: MOESM2 [file 9528202]
